# Supplementary material for: TACOA – Taxonomic classification of environmental genomic fragments using a kernelized nearest neighbor approach
Source: PubMed Central journal article supplement (PMC2653487; doi:10.1186/1471-2105-10-56), 2009-02-11
Supplement: 1471-2105-10-56-S1.pdf [file 1471-2105-10-56-S1.pdf]

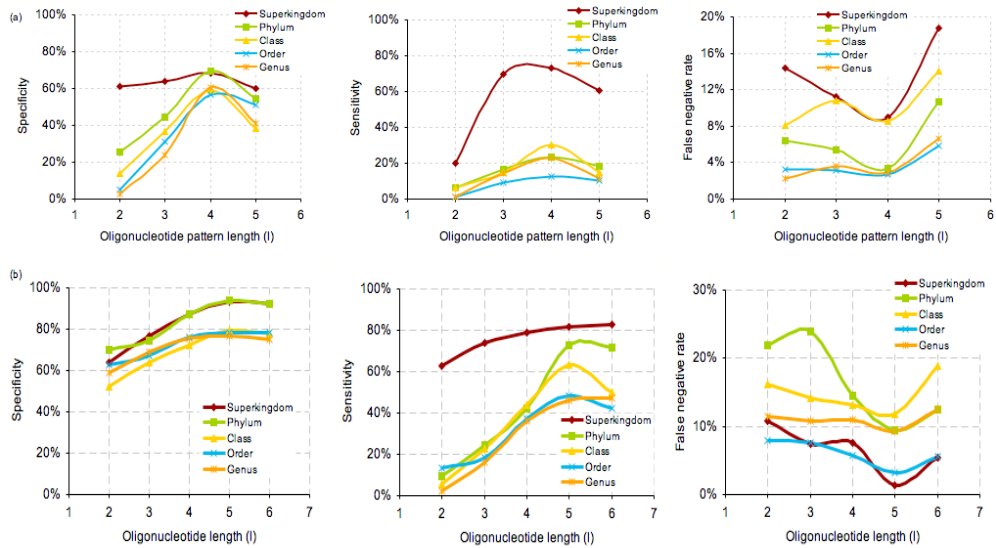

Additional figure 1: **Oligonucleotide length-dependent performance for two different genomic fragment length.** Achieved specificity (left), sensitivity (middle) and false negative rate (right) for different oligonucleotide lengths for genomic fragments of length 800bp (a) and 50Kbp (b). For clarity the standard deviation was not depicted in these figures, instead is given as Additional file 2.
