# Supplementary material for: TACOA – Taxonomic classification of environmental genomic fragments using a kernelized nearest neighbor approach
Source: PubMed Central journal article supplement (PMC2653487; doi:10.1186/1471-2105-10-56), 2009-02-11
Supplement: 1471-2105-10-56-S2.pdf [file 1471-2105-10-56-S2.pdf]

| Average specificity         |                            |              |              |        |              |       |              |       |              |       |              |
|-----------------------------|----------------------------|--------------|--------------|--------|--------------|-------|--------------|-------|--------------|-------|--------------|
| Genomic fragment length (s) | Oligonucleotide length (l) | Superkingdom | $\sigma \pm$ | Phylum | $\sigma \pm$ | Class | $\sigma \pm$ | Order | $\sigma \pm$ | Genus | $\sigma \pm$ |
| 800bp                       | 2                          | 0,61         | 0,51         | 0,26   | 0,28         | 0,14  | 0,19         | 0,05  | 0,16         | 0,03  | 0,12         |
|                             | 3                          | 0,64         | 0,50         | 0,45   | 0,21         | 0,37  | 0,23         | 0,31  | 0,26         | 0,24  | 0,22         |
|                             | 4                          | 0,73         | 0,44         | 0,70   | 0,23         | 0,61  | 0,28         | 0,59  | 0,28         | 0,58  | 0,24         |
|                             | 5*                         |              |              |        |              |       |              |       |              |       |              |
|                             | 6*                         |              |              |        |              |       |              |       |              |       |              |
|                             | 6                          | 0,92         | 0,24         | 0,92   | 0,02         | 0,78  | 0,05         | 0,79  | 0,29         | 0,75  | 0,28         |
| 50Kbp                       | 2                          | 0,64         | 0,50         | 0,70   | 0,19         | 0,52  | 0,35         | 0,63  | 0,46         | 0,59  | 0,38         |
|                             | 3                          | 0,76         | 0,32         | 0,74   | 0,08         | 0,64  | 0,28         | 0,67  | 0,40         | 0,69  | 0,39         |
|                             | 4                          | 0,87         | 0,17         | 0,87   | 0,05         | 0,72  | 0,22         | 0,76  | 0,30         | 0,75  | 0,27         |
|                             | 5                          | 0,93         | 0,12         | 0,94   | 0,02         | 0,80  | 0,22         | 0,78  | 0,37         | 0,77  | 0,12         |
|                             | 6                          | 0,92         | 0,24         | 0,92   | 0,02         | 0,78  | 0,05         | 0,79  | 0,29         | 0,75  | 0,28         |
|                             | 6                          | 0,92         | 0,24         | 0,92   | 0,02         | 0,78  | 0,05         | 0,79  | 0,29         | 0,75  | 0,28         |

  

| Average sensitivity         |                            |              |              |        |              |       |              |       |              |       |              |
|-----------------------------|----------------------------|--------------|--------------|--------|--------------|-------|--------------|-------|--------------|-------|--------------|
| Genomic fragment length (s) | Oligonucleotide length (l) | Superkingdom | $\sigma \pm$ | Phylum | $\sigma \pm$ | Class | $\sigma \pm$ | Order | $\sigma \pm$ | Genus | $\sigma \pm$ |
| 800bp                       | 2                          | 0,20         | 0,52         | 0,26   | 0,20         | 0,06  | 0,10         | 0,05  | 0,26         | 0,03  | 0,01         |
|                             | 3                          | 0,70         | 0,02         | 0,45   | 0,15         | 0,15  | 0,15         | 0,31  | 0,05         | 0,24  | 0,08         |
|                             | 4                          | 0,73         | 0,07         | 0,69   | 0,15         | 0,30  | 0,12         | 0,57  | 0,20         | 0,60  | 0,09         |
|                             | 5*                         |              |              |        |              |       |              |       |              |       |              |
|                             | 6*                         |              |              |        |              |       |              |       |              |       |              |
|                             | 6                          | 0,83         | 0,05         | 0,72   | 0,31         | 0,50  | 0,29         | 0,42  | 0,34         | 0,47  | 0,41         |
| 50Kbp                       | 2                          | 0,63         | 0,12         | 0,09   | 0,18         | 0,06  | 0,16         | 0,13  | 0,12         | 0,02  | 0,11         |
|                             | 3                          | 0,74         | 0,14         | 0,25   | 0,28         | 0,23  | 0,23         | 0,18  | 0,25         | 0,16  | 0,26         |
|                             | 4                          | 0,79         | 0,11         | 0,42   | 0,28         | 0,44  | 0,29         | 0,37  | 0,33         | 0,36  | 0,36         |
|                             | 5                          | 0,82         | 0,09         | 0,73   | 0,25         | 0,63  | 0,28         | 0,49  | 0,34         | 0,46  | 0,40         |
|                             | 6                          | 0,83         | 0,05         | 0,72   | 0,31         | 0,50  | 0,29         | 0,42  | 0,34         | 0,47  | 0,41         |
|                             | 6                          | 0,83         | 0,05         | 0,72   | 0,31         | 0,50  | 0,29         | 0,42  | 0,34         | 0,47  | 0,41         |

  

| Average false negative rate |                            |              |              |        |              |        |              |        |              |        |              |
|-----------------------------|----------------------------|--------------|--------------|--------|--------------|--------|--------------|--------|--------------|--------|--------------|
| Genomic fragment length (s) | Oligonucleotide length (l) | Superkingdom | $\sigma \pm$ | Phylum | $\sigma \pm$ | Class  | $\sigma \pm$ | Order  | $\sigma \pm$ | Genus  | $\sigma \pm$ |
| 800bp                       | 2                          | 0,1440       | 0,0220       | 0,0640 | 0,0360       | 0,0807 | 0,0287       | 0,0324 | 0,0665       | 0,0220 | 0,0247       |
|                             | 3                          | 0,1126       | 0,0003       | 0,0543 | 0,0106       | 0,1074 | 0,0669       | 0,0319 | 0,0160       | 0,0360 | 0,0425       |
|                             | 4                          | 0,0902       | 0,0001       | 0,0336 | 0,0032       | 0,0855 | 0,0767       | 0,0267 | 0,0120       | 0,0287 | 0,0357       |
|                             | 5*                         |              |              |        |              |        |              |        |              |        |              |
|                             | 6*                         |              |              |        |              |        |              |        |              |        |              |
|                             | 6                          | 0,05         | 0,04         | 0,12   | 0,01         | 0,19   | 0,01         | 0,05   | 0,12         | 0,05   | 0,09         |
| 50Kbp                       | 2                          | 0,11         | 0,03         | 0,22   | 0,00         | 0,16   | 0,02         | 0,02   | 0,03         | 0,08   | 0,06         |
|                             | 3                          | 0,07         | 0,06         | 0,24   | 0,01         | 0,14   | 0,03         | 0,02   | 0,03         | 0,08   | 0,02         |
|                             | 4                          | 0,08         | 0,09         | 0,15   | 0,01         | 0,13   | 0,03         | 0,02   | 0,04         | 0,06   | 0,03         |
|                             | 5                          | 0,01         | 0,06         | 0,09   | 0,00         | 0,12   | 0,04         | 0,03   | 0,06         | 0,03   | 0,04         |
|                             | 6                          | 0,05         | 0,04         | 0,12   | 0,01         | 0,19   | 0,01         | 0,05   | 0,12         | 0,05   | 0,09         |
|                             | 6                          | 0,05         | 0,04         | 0,12   | 0,01         | 0,19   | 0,01         | 0,05   | 0,12         | 0,05   | 0,09         |

\*Oligonucleotide length not evaluated due to lack of minimal fragment length require to contain all possible oligonucleotide patterns

Additional Table 1: **Standard deviation for average accuracy and false negative rate achieved for fragments of length 800bp and 50Kbp using different oligonucleotide length.** Standard deviation and average specificity, sensitivity and false negative rate is given for all oligonucleotide lengths and taxonomic ranks evaluated.
