# Supplementary material for: TACOA – Taxonomic classification of environmental genomic fragments using a kernelized nearest neighbor approach
Source: PubMed Central journal article supplement (PMC2653487; doi:10.1186/1471-2105-10-56), 2009-02-11
Supplement: 1471-2105-10-56-S3.pdf [file 1471-2105-10-56-S3.pdf]

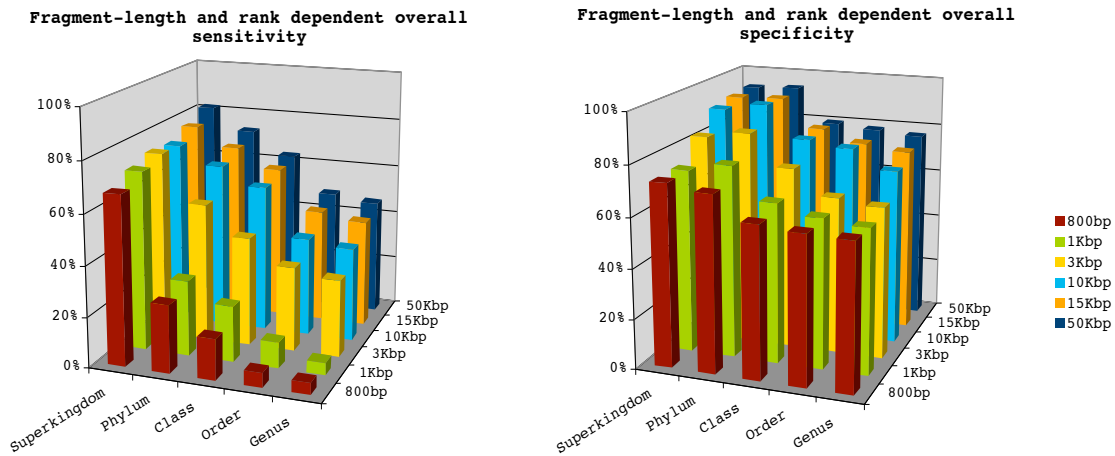

Additional figure 3: **Fragment-length and rank dependent performance.** Sensitivity (left) and specificity (right) achieved by TACO for each genomic fragment length and taxonomic rank evaluated. Single read lengths are simulated by fragments 800bp and 1Kbp long and contigs by fragment lengths between 3Kbp and 50Kbp.
