# Supplementary material for: TACOA – Taxonomic classification of environmental genomic fragments using a kernelized nearest neighbor approach
Source: PubMed Central journal article supplement (PMC2653487; doi:10.1186/1471-2105-10-56), 2009-02-11
Supplement: 1471-2105-10-56-S4.pdf [file 1471-2105-10-56-S4.pdf]

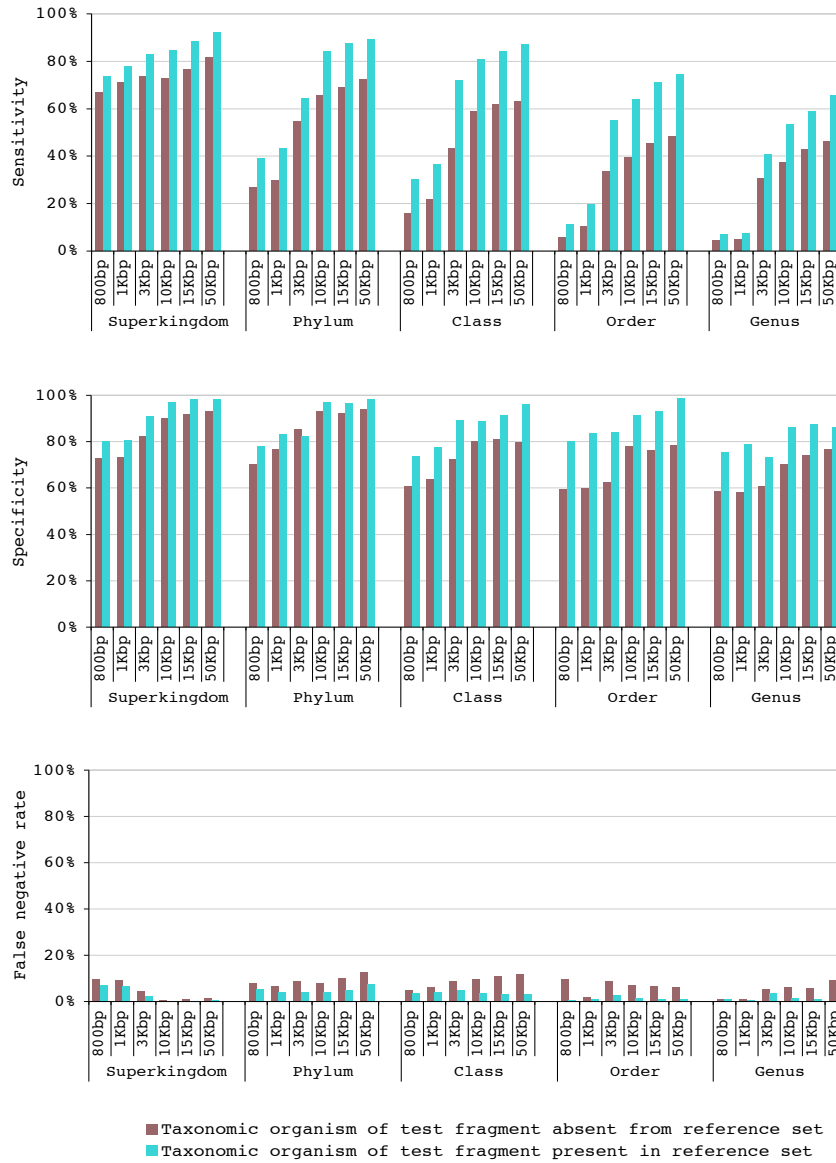

Additional figure 4: **Classification accuracy achieved using two different reference sets.** Each colored bar depicts the accuracy achieved by TACO A with two different reference sets. The label "Taxonomic organism of test fragment absent from reference set" refers when the test fragment is classified using a reference set not containing the source organism from which the test fragment originates from.
