# Supplementary material for: TACOA – Taxonomic classification of environmental genomic fragments using a kernelized nearest neighbor approach
Source: PubMed Central journal article supplement (PMC2653487; doi:10.1186/1471-2105-10-56), 2009-02-11
Supplement: 1471-2105-10-56-S7.pdf [file 1471-2105-10-56-S7.pdf]

| Additional file 7. Detailed accuracy obtained for reads 800bp long using TACOA and PhyloPythia |                     |             |             |                     |               |             |             |
|------------------------------------------------------------------------------------------------|---------------------|-------------|-------------|---------------------|---------------|-------------|-------------|
|                                                                                                |                     | Sensitivity |             | False Negative rate |               | Specificity |             |
|                                                                                                |                     | TACOA       | PhyloPythia | TACOA               | PhyloPythia   | TACOA       | PhyloPythia |
| Superkingdom                                                                                   | Archaea             | 60%         | 55%         | 22,50%              | 27,50%        | 47%         | 32%         |
|                                                                                                | Bacteria            | 81%         | 78%         | 4,66%               | 7,97%         | 98%         | 98%         |
| <b>Average</b>                                                                                 |                     | <b>71%</b>  | <b>66%</b>  | <b>13,58%</b>       | <b>17,73%</b> | <b>73%</b>  | <b>65%</b>  |
| Phylum                                                                                         | Crenarchaeota       | 33%         | 0%          | 10,00%              | 6,67%         | 77%         | -           |
|                                                                                                | Euryarchaeota       | 40%         | 40%         | 0,00%               | 0,00%         | 36%         | 33%         |
|                                                                                                | Actinobacteria      | 15%         | 55%         | 10,00%              | 0,00%         | 75%         | 100%        |
|                                                                                                | Bacteroidetes       | 0%          | 35%         | 15,00%              | 0,00%         | -           | 88%         |
|                                                                                                | Chlamydiae          | 10%         | 0%          | 10,00%              | 10,00%        | 40%         | -           |
|                                                                                                | Chlorobi            | 0%          | 0%          | 20,00%              | 0,00%         | -           | -           |
|                                                                                                | Chloroflexi         | 35%         | 0%          | 10,00%              | 0,00%         | 100%        | -           |
|                                                                                                | Cyanobacteria       | 5%          | 15%         | 2,50%               | 2,50%         | 100%        | 86%         |
|                                                                                                | Firmicutes          | 11%         | 15%         | 6,25%               | 7,50%         | 57%         | 80%         |
|                                                                                                | Proteobacteria      | 32%         | 16%         | 2,81%               | 0,61%         | 93%         | 98%         |
|                                                                                                | Spirochaetes        | 45%         | 0%          | 0,00%               | 0,00%         | 75%         | -           |
|                                                                                                | Thermotogae         | 35%         | 0%          | 5,00%               | 10,00%        | 100%        | -           |
| <b>Average</b>                                                                                 |                     | <b>22%</b>  | <b>15%</b>  | <b>7,63%</b>        | <b>3,11%</b>  | <b>75%</b>  | <b>81%</b>  |
| Class                                                                                          | Thermoprotei        | 17%         | 0%          | 3,33%               | 0,00%         | 100%        | -           |
|                                                                                                | Halobacteria        | 10%         | 0%          | 0,00%               | 0,00%         | 100%        | -           |
|                                                                                                | Actinobacteria      | 0%          | 0%          | 0,00%               | 0,00%         | -           | -           |
|                                                                                                | Bacteroidetes       | 0%          | 10%         | 0,00%               | 0,00%         | -           | 67%         |
|                                                                                                | Chlamydiae          | 0%          | 0%          | 0,00%               | 0,00%         | 0%          | -           |
|                                                                                                | Chlorobia           | 0%          | 0%          | 0,00%               | 0,00%         | -           | -           |
|                                                                                                | Chloroflexi         | 0%          | 0%          | 0,00%               | 0,00%         | -           | -           |
|                                                                                                | Dehalococcoidetes   | 0%          | 0%          | 0,00%               | 0,00%         | -           | -           |
|                                                                                                | Bacillales          | 0%          | 0%          | 0,00%               | 0,00%         | -           | -           |
|                                                                                                | Bacilli             | 0%          | 0%          | 0,00%               | 10,00%        | -           | -           |
|                                                                                                | Clostridia          | 0%          | 0%          | 0,00%               | 2,50%         | -           | -           |
|                                                                                                | Alphaproteobacteria | 7%          | 2%          | 0,00%               | 0,00%         | 100%        | -           |
|                                                                                                | Betaproteobacteria  | 2%          | 25%         | 0,00%               | 0,00%         | 100%        | 100%        |

|                       |           |           |              |           |            |            |
|-----------------------|-----------|-----------|--------------|-----------|------------|------------|
| Burkholderiales       | 0%        | 0%        | 0,00%        | 60,00%    | -          | 53%        |
| Deltaproteobacteria   | 0%        | 0%        | 0,00%        | 2,50%     | -          | -          |
| Epsilonproteobacteria | 0%        | 80%       | 0,00%        | 0,00%     | -          | -          |
| Gammaproteobacteria   | 3%        | 0%        | 0,00%        | 4,62%     | 100%       | 73%        |
| Pasteurellales        | 0%        | 0%        | 0,00%        | 0,00%     | -          | -          |
| Rhodocyclales         | 0%        | 0%        | 0,00%        | 5,00%     | -          | -          |
| Spirochaetes          | 20%       | 0%        | 0,00%        | 0,00%     | 100%       | -          |
| Thermotogae           | 0%        | 0%        | 0,00%        | 0,00%     | -          | -          |
| <b>Average</b>        | <b>3%</b> | <b>6%</b> | <b>0,16%</b> | <b>4%</b> | <b>86%</b> | <b>73%</b> |

(-) Undefined value

| Order |                         | Sensitivity |              | False Negative rate |             | Specificity |              |
|-------|-------------------------|-------------|--------------|---------------------|-------------|-------------|--------------|
|       |                         | TACOA       | PhyloPhythia | TACOA               | PhyloPythia | TACOA       | PhyloPhythia |
|       | Nitrosopumilales        | 0%          | 0%           | 0,10%               | 0,00%       | -           | -            |
|       | Sulfolobales            | 0%          | 0%           | 0,00%               | 0,00%       | -           | -            |
|       | Thermoproteales         | 20%         | 0%           | 30,00%              | 0,00%       | 100%        | -            |
|       | Halobacteriales         | 10%         | 0%           | 0,00%               | 0,00%       | 100%        | -            |
|       | Actinomycetales         | 0%          | 0%           | 0,00%               | 0,00%       | -           | -            |
|       | Bacteroidales           | 0%          | 0%           | 0,00%               | 0,00%       | -           | -            |
|       | Chlamydiales            | 0%          | 0%           | 0,00%               | 0,00%       | -           | -            |
|       | Chlorobiales            | 0%          | 0%           | 0,00%               | 0,00%       | -           | -            |
|       | Chloroflexales          | 0%          | 0%           | 0,00%               | 0,00%       | -           | -            |
|       | Dehalococcoidetes       | 0%          | 0%           | 0,00%               | 0,00%       | -           | -            |
|       | Chroococcales           | 0%          | 0%           | 0,00%               | 0,00%       | -           | -            |
|       | Prochlorales            | 0%          | 0%           | 0,00%               | 0,00%       | -           | -            |
|       | Bacilli                 | 0%          | 0%           | 0,00%               | 0,00%       | -           | -            |
|       | Lactobacillales         | 0%          | 0%           | 0,00%               | 0,00%       | -           | -            |
|       | Clostridiales           | 0%          | 0%           | 0,00%               | 0,00%       | -           | -            |
|       | Thermoanaerobacteriales | 0%          | 0%           | 0,00%               | 0,00%       | -           | -            |
|       | Rhodospirillales        | 0%          | 0%           | 0,00%               | 0,00%       | -           | -            |
|       | Rickettsiales           | 20%         | 0%           | 0,00%               | 0,00%       | 100%        | -            |
|       | Sphingomonadales        | 0%          | 0%           | 0,00%               | 0,00%       | -           | -            |

|                     |           |           |              |           |            |          |
|---------------------|-----------|-----------|--------------|-----------|------------|----------|
| Burkholderiales     | 3%        | 0%        | 0,00%        | 0,00%     | 100%       | -        |
| Nitrosomonadales    | 0%        | 0%        | 0,00%        | 0,00%     | -          | -        |
| Betaproteobacteria  | 0%        | 0%        | 0,00%        | 0,00%     | -          | -        |
| Desulfovibrionales  | 0%        | 0%        | 0,00%        | 0,00%     | -          | -        |
| Desulfuromonadales  | 0%        | 0%        | 0,00%        | 0,00%     | -          | -        |
| Campylobacterales   | 0%        | 0%        | 0,00%        | 0,00%     | -          | -        |
| Alteromonadales     | 5%        | 0%        | 0,00%        | 0,00%     | 50%        | -        |
| Enterobacteriales   | 0%        | 0%        | 0,00%        | 0,00%     | -          | -        |
| Pasteurellales      | 0%        | 0%        | 0,00%        | 0,00%     | -          | -        |
| Pseudomonadales     | 0%        | 0%        | 5,00%        | 0,00%     | -          | -        |
| Thiotrichales       | 0%        | 0%        | 0,00%        | 0,00%     | -          | -        |
| Vibrionales         | 0%        | 0%        | 0,00%        | 0,00%     | -          | -        |
| Xanthomonadales     | 0%        | 0%        | 0,00%        | 0,00%     | -          | -        |
| Gammaproteobacteria | 20%       | 0%        | 0,00%        | 0,00%     | 1%         | -        |
| Spirochaetales      | 20%       | 0%        | 0,00%        | 0,00%     | 100%       | -        |
| Thermotogales       | 0%        | 0%        | 0,00%        | 0,00%     | -          | -        |
| <b>Average</b>      | <b>3%</b> | <b>0%</b> | <b>1,00%</b> | <b>0%</b> | <b>79%</b> | <b>-</b> |

(-) Undefined value

| Genus           | Sensitivity |               | False Negative rate |             | Specificity |               |
|-----------------|-------------|---------------|---------------------|-------------|-------------|---------------|
|                 | TACOA       | PhyloPhyithia | TACOA               | PhyloPythia | TACOA       | PhyloPhyithia |
| Nitrosopumilus  | 0%          |               | 10,00%              |             | -           | -             |
| Metallosphaera  | 0%          | 0%            | 0,00%               | 0,00%       | -           | -             |
| Thermoproteus   | 0%          | 0%            | 40,00%              | 0,00%       | -           | -             |
| Halobacterium   | 10%         | 0%            | 0,00%               | 0,00%       | -           | -             |
| Mycobacterium   | 0%          | 0%            | 0,00%               | 0,00%       | -           | -             |
| Parabacteroides | 0%          | 0%            | 0,00%               | 0,00%       | -           | -             |
| Porphyromonas   | 0%          | 0%            | 0,00%               | 0,00%       | -           | -             |
| Chlamydophila   | 0%          | 0%            | 0,00%               | 0,00%       | -           | -             |
| Chlamydia       | 0%          | 0%            | 0,00%               | 0,00%       | -           | -             |
| Chlorobium      | 0%          | 0%            | 0,00%               | 0,00%       | -           | -             |
| Chloroflexus    | 0%          | 0%            | 0,00%               | 0,00%       | -           | -             |

|                    |     |    |       |       |      |   |
|--------------------|-----|----|-------|-------|------|---|
| Dehalococcoides    | 0%  | 0% | 0,00% | 0,00% | -    | - |
| Synechococcus      | 0%  | 0% | 0,00% | 0,00% | -    | - |
| Prochlorococcus    | 0%  | 0% | 0,00% | 0,00% | -    | - |
| Bacillus           | 0%  | 0% | 0,00% | 0,00% | -    | - |
| Lactobacillus      | 0%  | 0% | 0,00% | 0,00% | -    | - |
| Streptococcus      | 0%  | 0% | 0,00% | 0,00% | -    | - |
| Clostridium        | 0%  | 0% | 0,00% | 0,00% | -    | - |
| Thermoanaerobacter | 0%  | 0% | 0,00% | 0,00% | -    | - |
| Magnetospirillum   | 0%  | 0% | 0,00% | 0,00% | -    | - |
| Ehrlichia          | 10% | 0% | 0,00% | 0,00% | 100% | - |
| Rickettsia         | 30% | 0% | 0,00% | 0,00% | 100% | - |
| Erythrobacter      | 0%  | 0% | 0,00% | 0,00% | -    | - |
| Sphingomonas       | 0%  | 0% | 0,00% | 0,00% | -    | - |
| Sphingopyxis       | 0%  | 0% | 0,00% | 0,00% | -    | - |
| Ralstonia          | 0%  | 0% | 0,00% | 0,00% | -    | - |
| Nitrosomonas       | 0%  | 0% | 0,00% | 0,00% | -    | - |
| Nitrospira         | 0%  | 0% | 0,00% | 0,00% | -    | - |
| Burkholderia       | 10% | 0% | 0,00% | 0,00% | 100% | - |
| Desulfovibrio      | 0%  | 0% | 0,00% | 0,00% | -    | - |
| Lawsonia           | 0%  | 0% | 0,00% | 0,00% | -    | - |
| Geobacter          | 0%  | 0% | 0,00% | 0,00% | -    | - |
| Campylobacter      | 0%  | 0% | 0,00% | 0,00% | -    | - |
| Helicobacter       | 0%  | 0% | 0,00% | 0,00% | -    | - |
| Shewanella         | 5%  | 0% | 0,00% | 0,00% | 50%  | - |
| Serratia           | 0%  | 0% | 0,00% | 0,00% | -    | - |

(-) Undefined value

|                |                | Sensitivity |              | False Negative rate |             | Specificity |              |
|----------------|----------------|-------------|--------------|---------------------|-------------|-------------|--------------|
| Genus (Cont.)  |                | TACOA       | PhyloPhythia | TACOA               | PhyloPythia | TACOA       | PhyloPhythia |
|                | Shigella       | 0%          | 0%           | 0,00%               | 0,00%       | -           | -            |
|                | Acinetobacter  | 0%          | 0%           | 0,00%               | 0,00%       | -           | -            |
|                | Psychrobacter  | 0%          | 0%           | 10,00%              | 0,00%       | -           | -            |
|                | Francisella    | 0%          | 0%           | 0,00%               | 0,00%       | -           | -            |
|                | Thiomicrospira | 0%          | 0%           | 0,00%               | 0,00%       | -           | -            |
|                | Vibrio         | 0%          | 0%           | 0,00%               | 0,00%       | -           | -            |
|                | Xanthomonas    | 0%          | 0%           | 0,00%               | 0,00%       | -           | -            |
|                | Xylella        | 0%          | 0%           | 0,00%               | 0,00%       | -           | -            |
|                | Actinobacillus | 0%          | 0%           | 0,00%               | 0,00%       | -           | -            |
|                | Azoarcus       | 0%          | 0%           | 0,00%               | 0,00%       | -           | -            |
|                | Leptospira     | 20%         | 0%           | 0,00%               | 0,00%       | 100%        | -            |
|                | Thermotoga     | 0%          | 0%           | 0,00%               | 0,00%       | -           | -            |
| <b>Average</b> |                | <b>2%</b>   | <b>0%</b>    | <b>1,25%</b>        | <b>0%</b>   | <b>92%</b>  | <b>-</b>     |

(-) Undefined value
