# Supplementary material for: TACOA – Taxonomic classification of environmental genomic fragments using a kernelized nearest neighbor approach
Source: PubMed Central journal article supplement (PMC2653487; doi:10.1186/1471-2105-10-56), 2009-02-11
Supplement: 1471-2105-10-56-S8.pdf [file 1471-2105-10-56-S8.pdf]

Additional file 8. Detailed accuracy obtained for reads 1Kbp long using TACOA and PhyloPythia

|                |                     | Sensitivity |             | False Negative rate |               | Specificity |             |
|----------------|---------------------|-------------|-------------|---------------------|---------------|-------------|-------------|
|                |                     | TACOA       | PhyloPythia | TACOA               | PhyloPythia   | TACOA       | PhyloPythia |
| Superkingdom   | Archaea             | 70%         | 62%         | 25,00%              | 22,00%        | 58%         | 40%         |
|                | Bacteria            | 82%         | 88%         | 3,45%               | 7,83%         | 98%         | 98%         |
| <b>Average</b> |                     | <b>76%</b>  | <b>75%</b>  | <b>14,22%</b>       | <b>14,92%</b> | <b>78%</b>  | <b>69%</b>  |
| Phylum         | Crenarchaeota       | 40%         | 3%          | 6,67%               | 12,50%        | 92%         | 100%        |
|                | Euryarchaeota       | 70%         | 50%         | 0,00%               | 10,00%        | 64%         | 28%         |
|                | Actinobacteria      | 15%         | 75%         | 0,00%               | 0,00%         | 50%         | 75%         |
|                | Bacteroidetes       | 5%          | 47%         | 25,00%              | 0,00%         | 100%        | 93%         |
|                | Chlamydiae          | 40%         | 0%          | 0,00%               | 10,00%        | 89%         | -           |
|                | Chlorobi            | 0%          | 0%          | 5,00%               | 5,00%         | -           | -           |
|                | Chloroflexi         | 30%         | 0%          | 10,00%              | 5,00%         | 100%        | -           |
|                | Cyanobacteria       | 25%         | 25%         | 2,50%               | 7,50%         | 91%         | 91%         |
|                | Firmicutes          | 8%          | 26%         | 3,75%               | 11,25%        | 50%         | 72%         |
|                | Proteobacteria      | 33%         | 34%         | 1,88%               | 3,03%         | 96%         | 97%         |
|                | Spirochaetes        | 55%         | 10%         | 0,00%               | 5,00%         | 92%         | 100%        |
|                | Thermotogae         | 20%         | 0%          | 5,00%               | 5,00%         | 100%        | -           |
| <b>Average</b> |                     | <b>28%</b>  | <b>22%</b>  | <b>4,98%</b>        | <b>6%</b>     | <b>84%</b>  | <b>82%</b>  |
| Class          | Thermoprotei        | 27%         | 0%          | 3,33%               | 0,00%         | 100%        | -           |
|                | Halobacteria        | 40%         | 0%          | 10,00%              | 10,00%        | 100%        | -           |
|                | Actinobacteria      | 0%          | 15%         | 0,00%               | 0,00%         | 0%          | 75%         |
|                | Bacteroidetes       | 0%          | 13%         | 0,00%               | 0,00%         | -           | 100%        |
|                | Chlamydiae          | 30%         | 0%          | 0,00%               | 0,00%         | 38%         | -           |
|                | Chlorobia           | 0%          | 0%          | 5,00%               | 0,00%         | -           | -           |
|                | Chloroflexi         | 0%          | 0%          | 10,00%              | 10,00%        | -           | -           |
|                | Dehalococcoidetes   | 40%         | 0%          | 0,00%               | 0,00%         | 100%        | -           |
|                | Bacillales          | 0%          | 0%          | 0,00%               | 5,00%         | -           | -           |
|                | Bacilli             | 0%          | 0%          | 5,00%               | 0,00%         | -           | -           |
|                | Clostridia          | 3%          | 0%          | 0,00%               | 0,00%         | 100%        | -           |
|                | Alphaproteobacteria | 2%          | 5%          | 3,33%               | 0,00%         | 100%        | 100%        |
|                | Betaproteobacteria  | 12%         | 48%         | 0,00%               | 0,00%         | 75%         | 61%         |

|                       |            |           |              |           |            |            |
|-----------------------|------------|-----------|--------------|-----------|------------|------------|
| Burkholderiales       | 0%         | 0%        | 0,00%        | 70,00%    | -          | -          |
| Deltaproteobacteria   | 0%         | 0%        | 5,00%        | 0,00%     | -          | -          |
| Epsilonproteobacteria | 5%         | 95%       | 10,00%       | 5,00%     | 100%       | 76%        |
| Gammaproteobacteria   | 16%        | 6%        | 0,83%        | 4,62%     | 76%        | 100%       |
| Pasteurellales        | 0%         | 0%        | 0,00%        | 0,00%     | -          | -          |
| Rhodocyclales         | 0%         | 0%        | 10,00%       | 10,00%    | -          | -          |
| Spirochaetes          | 35%        | 10%       | 0,00%        | 0,00%     | 100%       | 100%       |
| Thermotogae           | 20%        | 0%        | 0,00%        | 0,00%     | 100%       | -          |
| <b>Average</b>        | <b>11%</b> | <b>9%</b> | <b>2,98%</b> | <b>5%</b> | <b>82%</b> | <b>87%</b> |

(-) Undefined value

| Order |                         | Sensitivity |              | False Negative rate |             | Specificity |              |
|-------|-------------------------|-------------|--------------|---------------------|-------------|-------------|--------------|
|       |                         | TACOA       | PhyloPhythia | TACOA               | PhyloPythia | TACOA       | PhyloPhythia |
|       | Nitrosopumilales        | 0%          | 0%           | 10,00%              | 0,00%       | -           | -            |
|       | Sulfolobales            | 0%          | 0%           | 0,00%               | 0,00%       | 0%          | -            |
|       | Thermoproteales         | 40%         | 0%           | 20,00%              | 0,00%       | 100%        | -            |
|       | Halobacteriales         | 40%         | 0%           | 10,00%              | 0,00%       | 100%        | -            |
|       | Actinomycetales         | 0%          | 0%           | 0,00%               | 0,00%       | 0%          | -            |
|       | Bacteroidales           | 0%          | 0%           | 0,00%               | 0,00%       | -           | -            |
|       | Chlamydiales            | 30%         | 0%           | 0,00%               | 0,00%       | 38%         | -            |
|       | Chlorobiales            | 0%          | 0%           | 0,00%               | 0,00%       | -           | -            |
|       | Chloroflexales          | 0%          | 0%           | 10,00%              | 0,00%       | -           | -            |
|       | Dehalococcoidetes       | 0%          | 0%           | 0,00%               | 0,00%       | -           | -            |
|       | Chroococcales           | 0%          | 0%           | 0,00%               | 0,00%       | -           | -            |
|       | Prochlorales            | 0%          | 0%           | 0,00%               | 0,00%       | -           | -            |
|       | Bacilli                 | 0%          | 0%           | 0,00%               | 0,00%       | -           | -            |
|       | Lactobacillales         | 0%          | 0%           | 0,00%               | 0,00%       | -           | -            |
|       | Clostridiales           | 5%          | 0%           | 0,00%               | 0,00%       | 100%        | -            |
|       | Thermoanaerobacteriales | 0%          | 0%           | 0,00%               | 0,00%       | -           | -            |
|       | Rhodospirillales        | 0%          | 0%           | 0,00%               | 0,00%       | -           | -            |
|       | Rickettsiales           | 5%          | 0%           | 10,00%              | 0,00%       | 100%        | -            |
|       | Sphingomonadales        | 0%          | 0%           | 0,00%               | 0,00%       | -           | -            |
|       | Burkholderiales         | 20%         | 0%           | 0,00%               | 0,00%       | 75%         | -            |

|                     |           |           |              |           |            |          |
|---------------------|-----------|-----------|--------------|-----------|------------|----------|
| Nitrosomonadales    | 0%        | 0%        | 0,00%        | 0,00%     | -          | -        |
| Betaproteobacteria  | 0%        | 0%        | 10,00%       | 0,00%     | -          | -        |
| Desulfovibrionales  | 0%        | 0%        | 5,00%        | 0,00%     | -          | -        |
| Desulfuromonadales  | 0%        | 0%        | 5,00%        | 0,00%     | -          | -        |
| Campylobacterales   | 5%        | 0%        | 0,00%        | 0,00%     | 100%       | -        |
| Alteromonadales     | 10%       | 0%        | 0,00%        | 0,00%     | 100%       | -        |
| Enterobacteriales   | 5%        | 0%        | 0,00%        | 0,00%     | 33%        | -        |
| Pasteurellales      | 20%       | 0%        | 0,00%        | 0,00%     | 67%        | -        |
| Pseudomonadales     | 15%       | 0%        | 0,00%        | 0,00%     | 100%       | -        |
| Thiotrichales       | 0%        | 0%        | 5,00%        | 0,00%     | -          | -        |
| Vibrionales         | 0%        | 0%        | 0,00%        | 0,00%     | -          | -        |
| Xanthomonadales     | 0%        | 0%        | 0,00%        | 0,00%     | -          | -        |
| Gammaproteobacteria | 0%        | 0%        | 0,00%        | 0,00%     | -          | -        |
| Spirochaetales      | 35%       | 0%        | 0,00%        | 0,00%     | 100%       | -        |
| Thermotogales       | 20%       | 0%        | 0,00%        | 0,00%     | 100%       | -        |
| <b>Average</b>      | <b>7%</b> | <b>0%</b> | <b>2,43%</b> | <b>0%</b> | <b>74%</b> | <b>-</b> |

(-) Undefined value

| Genus           |  | Sensitivity |               | False Negative rate |             | Specificity |             |
|-----------------|--|-------------|---------------|---------------------|-------------|-------------|-------------|
|                 |  | TACOA       | PhyloPhyithia | TACOA               | PhyloPythia | TACOA       | yloPhyithia |
| Nitrosopumilus  |  | 0%          | 0%            | 10,00%              | 0,00%       | -           | -           |
| Metallosphaera  |  | 0%          | 0%            | 0,00%               | 0,00%       | 0%          | -           |
| Thermoproteus   |  | 0%          | 0%            | 30,00%              | 0,00%       | -           | -           |
| Halobacterium   |  | 10%         | 0%            | 10,00%              | 0,00%       | 100%        | -           |
| Mycobacterium   |  | 0%          | 0%            | 0,00%               | 0,00%       | -           | -           |
| Parabacteroides |  | 0%          | 0%            | 0,00%               | 0,00%       | -           | -           |
| Porphyromonas   |  | 0%          | 0%            | 0,00%               | 0,00%       | -           | -           |
| Chlamydothrix   |  | 0%          | 0%            | 0,00%               | 0,00%       | 0%          | -           |
| Chlamydia       |  | 0%          | 0%            | 10,00%              | 0,00%       | -           | -           |
| Chlorobium      |  | 0%          | 0%            | 0,00%               | 0,00%       | -           | -           |
| Chloroflexus    |  | 0%          | 0%            | 10,00%              | 0,00%       | -           | -           |
| Dehalococcoides |  | 30%         | 0%            | 0,00%               | 0,00%       | 100%        | -           |
| Synechococcus   |  | 0%          | 0%            | 0,00%               | 0,00%       | -           | -           |

|                    |     |    |        |       |      |   |
|--------------------|-----|----|--------|-------|------|---|
| Prochlorococcus    | 0%  | 0% | 0,00%  | 0,00% | -    | - |
| Bacillus           | 0%  | 0% | 0,00%  | 0,00% | -    | - |
| Lactobacillus      | 0%  | 0% | 0,00%  | 0,00% | -    | - |
| Streptococcus      | 0%  | 0% | 0,00%  | 0,00% | -    | - |
| Clostridium        | 0%  | 0% | 0,00%  | 0,00% | -    | - |
| Thermoanaerobacter | 0%  | 0% | 0,00%  | 0,00% | -    | - |
| Magnetospirillum   | 0%  | 0% | 0,00%  | 0,00% | 0%   | - |
| Ehrlichia          | 10% | 0% | 10,00% | 0,00% | 100% | - |
| Rickettsia         | 0%  | 0% | 0,00%  | 0,00% | -    | - |
| Erythrobacter      | 0%  | 0% | 0,00%  | 0,00% | -    | - |
| Sphingomonas       | 0%  | 0% | 0,00%  | 0,00% | -    | - |
| Sphingopyxis       | 0%  | 0% | 0,00%  | 0,00% | -    | - |
| Ralstonia          | 0%  | 0% | 0,00%  | 0,00% | -    | - |
| Nitrosomonas       | 0%  | 0% | 0,00%  | 0,00% | -    | - |
| Nitrospira         | 0%  | 0% | 0,00%  | 0,00% | -    | - |
| Burkholderia       | 50% | 0% | 0,00%  | 0,00% | 100% | - |
| Desulfovibrio      | 0%  | 0% | 0,00%  | 0,00% | -    | - |
| Lawsonia           | 0%  | 0% | 0,00%  | 0,00% | -    | - |
| Geobacter          | 0%  | 0% | 0,00%  | 0,00% | -    | - |
| Campylobacter      | 0%  | 0% | 0,00%  | 0,00% | -    | - |
| Helicobacter       | 0%  | 0% | 0,00%  | 0,00% | -    | - |
| Shewanella         | 0%  | 0% | 0,00%  | 0,00% | -    | - |
| Serratia           | 0%  | 0% | 0,00%  | 0,00% | -    | - |

(-) Undefined value

|                |                | Sensitivity |              | False Negative rate |             | Specificity |            |
|----------------|----------------|-------------|--------------|---------------------|-------------|-------------|------------|
| Genus (Cont.)  |                | TACOA       | PhyloPhythia | TACOA               | PhyloPythia | TACOA       | yloPhythia |
|                | Shigella       | 0%          | 0%           | 0,00%               | 0,00%       | -           | -          |
|                | Acinetobacter  | 0%          | 0%           | 0,00%               | 0,00%       | -           | -          |
|                | Psychrobacter  | 0%          | 0%           | 0,00%               | 0,00%       | -           | -          |
|                | Francisella    | 0%          | 0%           | 0,00%               | 0,00%       | -           | -          |
|                | Thiomicrospira | 0%          | 0%           | 0,00%               | 0,00%       | -           | -          |
|                | Vibrio         | 0%          | 0%           | 0,00%               | 0,00%       | -           | -          |
|                | Xanthomonas    | 0%          | 0%           | 0,00%               | 0,00%       | -           | -          |
|                | Xylella        | 0%          | 0%           | 0,00%               | 0,00%       | -           | -          |
|                | Actinobacillus | 0%          | 0%           | 0,00%               | 0,00%       | -           | -          |
|                | Azoarcus       | 0%          | 0%           | 0,00%               | 0,00%       | -           | -          |
|                | Leptospira     | 30%         | 0%           | 0,00%               | 0,00%       | 100%        | -          |
|                | Thermotoga     | 10%         | 0%           | 0,00%               | 0,00%       | 100%        | -          |
| <b>Average</b> |                | <b>3%</b>   | <b>0%</b>    | <b>1,67%</b>        | <b>0%</b>   | <b>67%</b>  | <b>-</b>   |

(-) Undefined value
