# Supplementary material for: TACOA – Taxonomic classification of environmental genomic fragments using a kernelized nearest neighbor approach
Source: PubMed Central journal article supplement (PMC2653487; doi:10.1186/1471-2105-10-56), 2009-02-11
Supplement: 1471-2105-10-56-S9.pdf [file 1471-2105-10-56-S9.pdf]

| Additional file 9. Detailed accuracy obtained for reads 10Kbp long using TACOA and PhyloPythia |                     |             |             |                     |               |             |             |
|------------------------------------------------------------------------------------------------|---------------------|-------------|-------------|---------------------|---------------|-------------|-------------|
|                                                                                                |                     | Sensitivity |             | False Negative rate |               | Specificity |             |
|                                                                                                |                     | TACOA       | PhyloPythia | TACOA               | PhyloPythia   | TACOA       | PhyloPythia |
| Superkingdom                                                                                   | Archaea             | 75%         | 70%         | 0,00%               | 27,50%        | 94%         | 76%         |
|                                                                                                | Bacteria            | 70%         | 93%         | 0,34%               | 1,53%         | 100%        | 98%         |
| <b>Average</b>                                                                                 |                     | <b>73%</b>  | <b>82%</b>  | <b>0,17%</b>        | <b>14,51%</b> | <b>97%</b>  | <b>87%</b>  |
| Phylum                                                                                         | Crenarchaeota       | 60%         | 40%         | 3,33%               | 30,00%        | 100%        | 100%        |
|                                                                                                | Euryarchaeota       | 80%         | 60%         | 0,00%               | 40,00%        | 80%         | 27%         |
|                                                                                                | Actinobacteria      | 25%         | 100%        | 0,00%               | 0,00%         | 100%        | 83%         |
|                                                                                                | Bacteroidetes       | 0%          | 100%        | 0,00%               | 0,00%         | -           | 100%        |
|                                                                                                | Chlamydiae          | 90%         | 100%        | 0,00%               | 0,00%         | 100%        | 100%        |
|                                                                                                | Chlorobi            | 0%          | 0%          | 40,00%              | 50,00%        | -           | -           |
|                                                                                                | Chloroflexi         | 35%         | 0%          | 20,00%              | 5,00%         | 100%        | 100%        |
|                                                                                                | Cyanobacteria       | 43%         | 93%         | 0,00%               | 5,00%         | 100%        | 97%         |
|                                                                                                | Firmicutes          | 40%         | 100%        | 0,00%               | 0,00%         | 97%         | 92%         |
|                                                                                                | Proteobacteria      | 59%         | 90%         | 0,63%               | 1,82%         | 94%         | 96%         |
|                                                                                                | Spirochaetes        | 30%         | 50%         | 0,00%               | 0,00%         | 100%        | 100%        |
|                                                                                                | Thermotogae         | 35%         | 0%          | 0,00%               | 45,00%        | 100%        | -           |
| <b>Average</b>                                                                                 |                     | <b>41%</b>  | <b>61%</b>  | <b>5,33%</b>        | <b>15%</b>    | <b>97%</b>  | <b>90%</b>  |
| Class                                                                                          | Thermoprotei        | 53%         | 40%         | 0,00%               | 16,67%        | 100%        | 100%        |
|                                                                                                | Halobacteria        | 80%         | 0%          | 0,00%               | 40,00%        | 100%        | -           |
|                                                                                                | Actinobacteria      | 25%         | 100%        | 0,00%               | 0,00%         | 100%        | 83%         |
|                                                                                                | Bacteroidetes       | 0%          | 100%        | 0,00%               | 0,00%         | -           | 100%        |
|                                                                                                | Chlamydiae          | 100%        | 100%        | 0,00%               | 0,00%         | 56%         | 50%         |
|                                                                                                | Chlorobia           | 0%          | 0%          | 35,00%              | 45,00%        | -           | -           |
|                                                                                                | Chloroflexi         | 0%          | 0%          | 0,00%               | 0,00%         | -           | 100%        |
|                                                                                                | Dehalococcoidetes   | 70%         | 0%          | 0,00%               | 0,00%         | 100%        | -           |
|                                                                                                | Bacillales          | 0%          | 0%          | 55,00%              | 100,00%       | -           | -           |
|                                                                                                | Bacilli             | 50%         | 95%         | 5,00%               | 0,00%         | 45%         | 48%         |
|                                                                                                | Clostridia          | 15%         | 98%         | 0,00%               | 0,00%         | 100%        | 91%         |
|                                                                                                | Alphaproteobacteria | 40%         | 80%         | 0,00%               | 0,00%         | 100%        | 89%         |
|                                                                                                | Betaproteobacteria  | 20%         | 65%         | 2,00%               | 0,00%         | 91%         | 53%         |

|                       |            |            |              |            |            |            |
|-----------------------|------------|------------|--------------|------------|------------|------------|
| Burkholderiales       | 0%         | 0%         | 0,00%        | 100,00%    |            | -          |
| Deltaproteobacteria   | 13%        | 73%        | 2,50%        | 17,50%     | 100%       | 78%        |
| Epsilonproteobacteria | 30%        | 95%        | 10,00%       | 0,00%      | 100%       | 83%        |
| Gammaproteobacteria   | 61%        | 88%        | 0,83%        | 6,15%      | 84%        | 87%        |
| Pasteurellales        | 0%         | 0%         | 40,00%       | 100,00%    | -          | -          |
| Rhodocyclales         | 0%         | 0%         | 5,00%        | 85,00%     | -          | -          |
| Spirochaetes          | 30%        | 45%        | 0,00%        | 5,00%      | 100%       | 100%       |
| Thermotogae           | 35%        | 0%         | 0,00%        | 45,00%     | 100%       | -          |
| <b>Average</b>        | <b>30%</b> | <b>47%</b> | <b>7,40%</b> | <b>27%</b> | <b>91%</b> | <b>82%</b> |

(-) Undefined value

| Order |                         | Sensitivity |              | False Negative rate |             | Specificity |              |
|-------|-------------------------|-------------|--------------|---------------------|-------------|-------------|--------------|
|       |                         | TACOA       | PhyloPhythia | TACOA               | PhyloPythia | TACOA       | PhyloPhythia |
|       | Nitrosopumilales        | 0%          | 0%           | 10,00%              | 0,00%       | -           | -            |
|       | Sulfolobales            | 0%          | 0%           | 0,00%               | 0,00%       | -           | -            |
|       | Thermoproteales         | 90%         | 0%           | 0,00%               | 0,00%       | 100%        | -            |
|       | Halobacteriales         | 10%         | 0%           | 0,00%               | 0,00%       | 100%        | -            |
|       | Actinomycetales         | 0%          | 0%           | 0,00%               | 0,00%       | -           | -            |
|       | Bacteroidales           | 0%          | 0%           | 0,00%               | 0,00%       | -           | -            |
|       | Chlamydiales            | 100%        | 0%           | 0,00%               | 0,00%       | 56%         | -            |
|       | Chlorobiales            | 0%          | 0%           | 10,00%              | 0,00%       | -           | -            |
|       | Chloroflexales          | 0%          | 0%           | 0,00%               | 0,00%       | -           | -            |
|       | Dehalococcoidetes       | 0%          | 0%           | 0,00%               | 0,00%       | -           | -            |
|       | Chroococcales           | 0%          | 0%           | 0,00%               | 0,00%       | -           | -            |
|       | Prochlorales            | 15%         | 0%           | 0,00%               | 0,00%       | 100%        | -            |
|       | Bacilli                 | 0%          | 0%           | 0,00%               | 0,00%       | -           | -            |
|       | Lactobacillales         | 50%         | 0%           | 0,00%               | 0,00%       | 100%        | -            |
|       | Clostridiales           | 5%          | 0%           | 0,00%               | 0,00%       | 100%        | -            |
|       | Thermoanaerobacteriales | 0%          | 0%           | 0,00%               | 0,00%       | -           | -            |
|       | Rhodospirillales        | 0%          | 0%           | 0,00%               | 0,00%       | -           | -            |
|       | Rickettsiales           | 55%         | 0%           | 0,00%               | 0,00%       | 100%        | -            |
|       | Sphingomonadales        | 0%          | 0%           | 6,67%               | 0,00%       | -           | -            |
|       | Burkholderiales         | 27%         | 0%           | 0,00%               | 0,00%       | 100%        | -            |

|                     |            |           |              |           |            |          |
|---------------------|------------|-----------|--------------|-----------|------------|----------|
| Nitrosomonadales    | 0%         | 0%        | 5,00%        | 0,00%     | -          | -        |
| Betaproteobacteria  | 0%         | 0%        | 0,00%        | 0,00%     | -          | -        |
| Desulfovibrionales  | 5%         | 0%        | 0,00%        | 0,00%     | 100%       | -        |
| Desulfuromonadales  | 0%         | 0%        | 0,00%        | 0,00%     | -          | -        |
| Campylobacterales   | 15%        | 0%        | 0,00%        | 0,00%     | 100%       | -        |
| Alteromonadales     | 45%        | 0%        | 0,00%        | 0,00%     | 100%       | -        |
| Enterobacteriales   | 30%        | 0%        | 0,00%        | 0,00%     | 86%        | -        |
| Pasteurellales      | 60%        | 0%        | 0,00%        | 0,00%     | 75%        | -        |
| Pseudomonadales     | 10%        | 0%        | 0,00%        | 0,00%     | 100%       | -        |
| Thiotrichales       | 10%        | 0%        | 0,00%        | 0,00%     | 100%       | -        |
| Vibrionales         | 20%        | 0%        | 0,00%        | 0,00%     | 100%       | -        |
| Xanthomonadales     | 5%         | 0%        | 0,00%        | 0,00%     | 100%       | -        |
| Gammaproteobacteria | 0%         | 0%        | 0,00%        | 0,00%     | -          | -        |
| Spirochaetales      | 30%        | 0%        | 0,00%        | 5,00%     | 100%       | -        |
| Thermotogales       | 15%        | 0%        | 0,00%        | 0,00%     | 100%       | -        |
| <b>Average</b>      | <b>17%</b> | <b>0%</b> | <b>0,90%</b> | <b>0%</b> | <b>96%</b> | <b>-</b> |

(-) Undefined value

| Genus           |  | Sensitivity |               | False Negative rate |             | Specificity |               |
|-----------------|--|-------------|---------------|---------------------|-------------|-------------|---------------|
|                 |  | TACOA       | PhyloPhyithia | TACOA               | PhyloPythia | TACOA       | PhyloPhyithia |
| Nitrosopumilus  |  | 0%          | 0%            | 10,00%              | 0,00%       | -           | -             |
| Metallosphaera  |  | 0%          | 0%            | 0,00%               | 0,00%       | 0%          | -             |
| Thermoproteus   |  | 0%          | 0%            | 90,00%              | 0,00%       | -           | -             |
| Halobacterium   |  | 0%          | 0%            | 0,00%               | 0,00%       | -           | -             |
| Mycobacterium   |  | 0%          | 0%            | 0,00%               | 0,00%       | -           | -             |
| Parabacteroides |  | 0%          | 0%            | 0,00%               | 0,00%       | -           | -             |
| Porphyromonas   |  | 0%          | 0%            | 0,00%               | 0,00%       | -           | -             |
| Chlamydothrix   |  | 0%          | 0%            | 0,00%               | 0,00%       | -           | -             |
| Chlamydia       |  | 0%          | 0%            | 0,00%               | 0,00%       | -           | -             |
| Chlorobium      |  | 0%          | 0%            | 10,00%              | 0,00%       | -           | -             |
| Chloroflexus    |  | 0%          | 0%            | 0,00%               | 0,00%       | -           | -             |
| Dehalococcoides |  | 70%         | 0%            | 0,00%               | 0,00%       | 100%        | -             |
| Synechococcus   |  | 0%          | 0%            | 0,00%               | 0,00%       | -           | -             |

|                    |      |    |       |       |      |   |
|--------------------|------|----|-------|-------|------|---|
| Prochlorococcus    | 0%   | 0% | 0,00% | 0,00% | -    | - |
| Bacillus           | 0%   | 0% | 0,00% | 0,00% | -    | - |
| Lactobacillus      | 0%   | 0% | 0,00% | 0,00% | -    | - |
| Streptococcus      | 100% | 0% | 0,00% | 0,00% | 100% | - |
| Clostridium        | 5%   | 0% | 0,00% | 0,00% | 100% | - |
| Thermoanaerobacter | 0%   | 0% | 0,00% | 0,00% | -    | - |
| Magnetospirillum   | 0%   | 0% | 0,00% | 0,00% | -    | - |
| Ehrlichia          | 10%  | 0% | 0,00% | 0,00% | 100% | - |
| Rickettsia         | 100% | 0% | 0,00% | 0,00% | 100% | - |
| Erythrobacter      | 0%   | 0% | 0,00% | 0,00% | -    | - |
| Sphingomonas       | 0%   | 0% | 0,00% | 0,00% | -    | - |
| Sphingopyxis       | 0%   | 0% | 0,00% | 0,00% | -    | - |
| Ralstonia          | 0%   | 0% | 0,00% | 0,00% | -    | - |
| Nitrosomonas       | 0%   | 0% | 0,00% | 0,00% | -    | - |
| Nitrospira         | 0%   | 0% | 0,00% | 0,00% | -    | - |
| Burkholderia       | 80%  | 0% | 0,00% | 0,00% | 100% | - |
| Desulfovibrio      | 10%  | 0% | 0,00% | 0,00% | 100% | - |
| Lawsonia           | 0%   | 0% | 0,00% | 0,00% | -    | - |
| Geobacter          | 0%   | 0% | 0,00% | 0,00% | -    | - |
| Campylobacter      | 0%   | 0% | 0,00% | 0,00% | -    | - |
| Helicobacter       | 10%  | 0% | 0,00% | 0,00% | 100% | - |
| Shewanella         | 15%  | 0% | 0,00% | 0,00% | 100% | - |
| Serratia           | 0%   | 0% | 0,00% | 0,00% | -    | - |

(-) Undefined value

| Genus (Cont.)  |  | Sensitivity |              | False Negative rate |              | Specificity |              |
|----------------|--|-------------|--------------|---------------------|--------------|-------------|--------------|
|                |  | TACOA       | PhyloPhythia | TACOA               | PhyloPythia  | TACOA       | PhyloPhythia |
| Shigella       |  | 0%          | 0%           | 0,00%               | 0,00%        | -           | -            |
| Acinetobacter  |  | 0%          | 0%           | 0,00%               | 0,00%        | -           | -            |
| Psychrobacter  |  | 20%         | 0%           | 0,00%               | 0,00%        | 100%        | -            |
| Francisella    |  | 10%         | 0%           | 0,00%               | 0,00%        | 100%        | -            |
| Thiomicrospira |  | 0%          | 0%           | 0,00%               | 0,00%        | -           | -            |
| Vibrio         |  | 20%         | 0%           | 0,00%               | 0,00%        | 100%        | -            |
| Xanthomonas    |  | 0%          | 0%           | 0,00%               | 0,00%        | -           | -            |
| Xylella        |  | 10%         | 0%           | 0,00%               | 0,00%        | 100%        | -            |
| Actinobacillus |  | 0%          | 0%           | 0,00%               | 0,00%        | -           | -            |
| Azoarcus       |  | 0%          | 0%           | 0,00%               | 0,00%        | -           | -            |
| Leptospira     |  | 30%         | 0%           | 0,00%               | 5,00%        | 100%        | -            |
| Thermotoga     |  | 10%         | 0%           | 0,00%               | 0,00%        | 100%        | -            |
| <b>Average</b> |  | <b>10%</b>  | <b>0%</b>    | <b>2,29%</b>        | <b>0,10%</b> | <b>94%</b>  | <b>-</b>     |

(-) Undefined value
